# Supplementary material for: Spores of Clostridioides difficile are toxin delivery vehicles
Source: Commun Biol. 2024 Jul 10;7:839. doi: 10.1038/s42003-024-06521-x (PMC11237016; doi:10.1038/s42003-024-06521-x)
Supplement: Supplementary file 1 — cassona et al supplemental information revised [file 42003_2024_6521_MOESM1_ESM.pdf]

## Supplementary Information

### Spores of *Clostridioides difficile* are toxin delivery vehicles

Carolina P. Cassona<sup>1</sup>, Sara Ramalheite<sup>1</sup>, Khira Amara<sup>1</sup>, Thomas Candela<sup>2</sup>,  
Imad Kansau<sup>2</sup>, Cécile Denève-Larrazet<sup>2</sup>, Claire Janoir-Jouvesshomme<sup>2</sup>, Jaime  
Mota<sup>3,4</sup>, Bruno Dupuy<sup>5</sup>, Mónica Serrano<sup>1</sup>, Adriano O. Henriques<sup>1\*</sup>

<sup>1</sup>Instituto de Tecnologia Química e Biológica, NOVA University Lisbon, Oeiras, Portugal;

<sup>2</sup>Micalis Institute, Université Paris-Saclay, INRAE, AgroParisTech, Jouy-en-Josas, France;

<sup>3</sup>Associate Laboratory i4HB, Institute for Health and Bioeconomy, NOVA School of Science and Technology, NOVA University Lisbon, Caparica, Portugal;

<sup>4</sup>CIBIO, Applied Molecular Biosciences Unit, Department of Life Sciences, NOVA School of Science and Technology, NOVA University Lisbon, Caparica, Portugal;

<sup>5</sup>Institut Pasteur, Université Paris-Cité, UMR-CNRS 6047, Laboratoire Pathogenèse des Bactéries Anaérobies, F-75015 Paris, France.

**\*Corresponding author:** Instituto de Tecnologia Química e Biológica, Universidade Nova de Lisboa, Avenida da República, Apartado 127, 2781-901 Oeiras, Portugal; Telephone: +351-21-4469521; Fax: +351-21-4411277; e-mail: [aoh@itqb.unl.pt](mailto:aoh@itqb.unl.pt)

**Running title:** Toxic spores of *C. difficile*

**Keywords:** PaLoc; *Clostridium difficile*; *Clostridium difficile* infection; sporulation; TcdA; TcdB

**Subject terms:** biological sciences/microbiology/pathogens

## 32 **Supplementary Materials**

- 33 **Supplementary methods** - Additional methods.
- 34 **Supplementary Figure S1** - Sporulation and SNAP<sup>Cd</sup> labelling.
- 35 **Supplementary Figure S2** - Assessing the extent of SNAP<sup>Cd</sup> labeling.
- 36 **Supplementary Figure S3** - Deletion analysis of the *tcdR* regulatory region.
- 37 **Supplementary Figure S4** - Expression of *tcdR* in sporulation mutants.
- 38 **Supplementary Figure S5** - Quantification of spore-associated TcdA.
- 39 **Supplementary Figure S6** - TcdA associates with spores of various ribotypes.
- 40 **Supplementary Figure S7** - Forespore or mother cell-specific expression of *tcdR*.
- 41 **Supplementary Figure S8** - Mature spores are have a cytopathic effect.
- 42 **Supplementary Figure S9** - Original immunoblots and fluoroimaging scans for
- 43 Figure S2.
- 44 **Supplementary Figure S10** - Original gels and fluoroimaging scans for Figure 4d
- 45 and e.
- 46 **Supplementary Figure S11** - Original gels and immunoblots for Figure 5b.
- 47 **Supplementary Figure S12** - Original gels and immunoblots for Figure 5c.
- 48 **Supplementary Figure S13** - Original immunoblots for Figure S5.
- 49 **Supplementary Figure S14** - Original gels and immunoblots for Figure S6.
- 50 **Supplementary Figure S15** - Original immunoblots for Figure S7.
- 51 **Supplementary Table S1** Heat resistant spore counts.
- 52 **Supplementary Table S2** Plasmids used in this study.
- 53 **Supplementary Table S3** Bacterial strains used in this study
- 54 **Supplementary references**
- 55
- 56
- 57
- 58

## 59 Supplementary methods

60 **Transcriptional fusions of PaLoc promoters to the *SNAP<sup>Cd</sup>* reporter.** For the  
 61 construction of transcriptional *SNAP<sup>Cd</sup>* fusions to the promoters of the PaLoc genes  
 62 *tcdR*, *tcdA*, *tcdB*, *tcdE* and *tcdC*, plasmid pFT47<sup>1</sup> was used. The promoter regions  
 63 of these genes were PCR-amplified using genomic DNA from *C. difficile* 630 $\Delta$ *erm*  
 64 with the primer pairs PtcdR-SNAP-EcoRI-Fw/ PtcdR-SNAP-XhoI-Rev, PtcdA-SNAP-  
 65 EcoRI-Fw/ PtcdA-SNAP-XhoI-Rev, PtcdB-SNAP-EcoRI-Fw/ PtcdB-SNAP-XhoI-Rev,  
 66 PtcdC-SNAP-EcoRI-Fw/ PtcdC-SNAP-XhoI-Rev and PtcdE-SNAP-EcoRI-Fw/  
 67 PtcdE-SNAP-XhoI-Rev (Table 1), to produce, 815, 520, 530, 430 and 600bp  
 68 products, respectively. The promoter fragments were cloned between the EcoRI/  
 69 XhoI sites of pFT47 to yield pMS464, pMS470, pMS471, pMS472 and pMS473 (see  
 70 S4 Table). The plasmids were introduced into *E. coli* HB101 (RP4) yielding strains  
 71 AHEC125, AHEC144, AHEC145, AHEC146 and AHEC147 and then transferred to  
 72 *C. difficile* 630 $\Delta$ *erm* by conjugation, producing strains AHCD608 and AHCD668  
 73 through AHCD671 (Table S2).

74 Plasmid pMS464 was also introduced into the *C. difficile* 630 $\Delta$ *erm*  
 75 sporulation mutants *sigF* (AHCD533), *sigE* (AHCD532), *sigG* (AHCD534), *sigK*  
 76 (AHCD535) and *spo0A* (AHCD536), yielding strains AHCD647 through AHCD651;  
 77 pMS464 was also conjugated into a  $\Delta$ *spoVT* mutant (our strain AHCD659; this  
 78 work, see below) originating AHCD777. Additionally, pMS464 and pMS470 were  
 79 conjugated into a  $\Delta$ *sigD* mutant (AHCD687) producing strains AHCD780 and  
 80 AHCD779, respectively.

81 **Deletion and mutational analysis of the *tcdR* regulatory region.** For deletion  
 82 analysis of the *tcdR* promoter a fragment of 183 bp (fragment P<sub>*tcdR-D*</sub>) was fused to  
 83 *SNAP<sup>Cd</sup>* in pFT47, according to the general strategy outlined above for the full-

length fusion (Fig. S3). The fragment was PCR-amplified using the primer pair P<sub>tcdR</sub>-  
A-SNAP-EcoRI-Fw/ P<sub>tcdR</sub>-SNAP-XhoI-Rev and inserted between the EcoRI/XhoI  
sites of pFT47, yielding pCC20. The plasmid was introduced into *E. coli* HB101  
(RP4) yielding strain AHEC237 and transferred to *C. difficile* 630 $\Delta$ erm by  
conjugation, producing strain AHCD795.

To introduce point mutations at the -10 region of the  $\sigma^D$  promoter located  
upstream of *tcdR* (Fig. S3) overlap extension PCR was performed, initially using the  
primer pairs P<sub>tcdR</sub>-SNAP-EcoRI-Fw/ P<sub>sigD</sub>mut-Rev and P<sub>sigD</sub>mut-Fw/ P<sub>tcdR</sub>-  
SNAP-XhoI-Rev that originated fragments of 741 and 195 bp, and then, after mixing  
the two fragments, with P<sub>tcdR</sub>-SNAP-EcoRI-Fw/ P<sub>tcdR</sub>-SNAP-XhoI-Rev. The final  
PCR product was cloned between EcoRI/XhoI sites of pFT47 to give pCC27. The  
plasmid was transformed into *E. coli* HB101 (RP4) yielding strain AHEC274 and  
then transferred to *C. difficile* 630 $\Delta$ erm by conjugation, producing strain AHCD821.

#### Construction of a $\Delta$ *tcdR* mutant through allele coupled exchange. Allele

coupled exchange using a *pyrE* strain<sup>2</sup> was used to obtain in frame deletions of the  
*tcdR* gene in *C. difficile* 630 $\Delta$ erm and R20291. *pyrE* negative strains previously  
constructed<sup>2</sup> were used in order to allow for a positive/negative selection. An allele  
exchange cassette was obtained by overlap extension PCR using the primer pair  
tcdR-Ascl-Fw/tcdR-SOE-Rev for the left-hand homology arm (LHA) originating a  
631 bp fragment and tcdR-SOE-Fw/tcdR-Sbfl-Rev for the right-hand homology arm  
(RHA) originating a 522 bp fragment. The final PCR was performed with the primer  
pair tcdR-Ascl-Fw/ tcdR-Sbfl-Rev and the resulting fragments inserted between the  
Sbfl and Ascl sites of pMTL-YN3, to give pSR3 (for the construction of the  $\Delta$ *tcdR*  
mutant) in 630 $\Delta$ erm, and pMTL-YN4, to give pSR2 (for the construction of the  
 $\Delta$ *tcdR* mutant in R20291). pSR3 and pSR2 were transformed into *E. coli* HB101

(RP4) to give AHEC239 and AHEC227, respectively, and then moved from these strains, by conjugation, into *C. difficile* 630 $\Delta$ erm $\Delta$ pyrE and R20291 $\Delta$ pyrE<sup>2</sup>. *C. difficile* transconjugants were selected by sub-culturing on BHI agar containing thiamphenicol (15  $\mu$ g/mL) and cefoxitin (25  $\mu$ g/mL) and re-streaked twice in this medium for 630 $\Delta$ erm and four times for R20291. Colonies were screened by colony PCR with DNA obtained using 5% chelex resin (Sigma–Aldrich) to identify single-crossover mutants. For the *tcdR* gene the primer pairs YN3-vef-Fw/ *tcdR*-vef-Fw and YN3-vef-Rev/ *tcdR*-vef-Rev for 630 $\Delta$ erm or YN4-vef-Fw/ *tcdR*-vef-Fw and YN4-vef-Rev/ *tcdR*-vef-Rev for R20291. The single-crossover mutants identified were streaked onto CDMM<sup>3</sup> with 1% agar supplemented with 5-Fluoroorotic acid (2 mg/mL) and uracil (5  $\mu$ g/mL) in order to select for plasmid excision. The isolated FOA-resistant colonies were screened by colony PCR as above using the primer pair *tcdR*-vef-Fw/ *tcdR*-vef-Rev. The primers used flank the upstream and downstream homology regions. The double-crossover mutants that were thiamphenicol sensitive (AHCD811 in 630 $\Delta$ erm and AHCD1093 in R20291) were reverted to a PyrE<sup>+</sup> phenotype through conjugation with plasmid pMTL-YN1 for 630 $\Delta$ erm and pMTL-YN2 for R20291. The resulting colonies were streaked onto non-supplemented CDMM agar and the restoration of the *pyrE* allele was confirmed by colony PCR using the primer pair *pyrE*-vef-Fw/*pyrE*-vef-Rev. Isolates with the expected structure were identified and named AHCD820 ( $\Delta$ *tcdR* in 630 $\Delta$ erm) and AHCD1102 ( $\Delta$ *tcdR* in R20291).

Plasmids pMS470 and pMS464 (above; Table S3) were then introduced into the 630 $\Delta$ erm  $\Delta$ *tcdR* mutant (AHCD820) by conjugation with *E. coli* HB101 (RP4) derivatives, which resulted in strains AHCD840 and AHCD841 for  $\Delta$ *tcdR*, respectively.

**134 Construction of  $\Delta tcdA$  and  $\Delta tcdB$  mutants and of a  $\Delta tcdA\Delta tcdB$  double**  
**135 mutant through allele coupled exchange.** Allelic exchange<sup>2</sup> was also used to  
**136** construct  $\Delta tcdA$  and  $\Delta tcdB$  mutants and the double mutant  $\Delta tcdA\Delta tcdB$ . Plasmids  
**137** pSR7 and pSR8 were used to delete *tcdA* and *tcdB*, respectively. For the  
**138** construction of pSR7 the allele exchange cassettes were obtained by overlap  
**139** extension PCR using the primer pairs *tcdA*-Ascl-Fw/*tcdA*-SOE-Rev for the LHA  
**140** originating a 626 bp fragment and *tcdA*-SOE-Fw/ *tcdA*-Sbfl-Rev for the RHA  
**141** originating a 544 bp fragment. The final PCR was obtained with the primer pair  
**142** *tcdA*-Ascl-Fw/ *tcdA*-Sbfl-Rev. For the construction of pSR8, the allele exchange  
**143** cassettes were obtained by overlap extension PCR using the primer pairs *tcdB*-  
**144** Ascl-Fw/ *tcdB*-SOE-Rev for the LHA originating a 635 bp fragment and *tcdB*-SOE-  
**145** Fw/ *tcdB*-Sbfl-Rev for the RHA originating a 497 bp fragment. The final PCR was  
**146** obtained with the primer pair *tcdB*-Ascl-Fw/ *tcdB*-Sbfl-Rev. All plasmids were verified  
**147** by DNA sequencing. The plasmids obtained were transformed into *E. coli* HB101  
**148** (RP4) yielding strains AHEC498 (for  $\Delta tcdA$ ) and AHEC499 (for  $\Delta tcdB$ ). The *E. coli*  
**149** strains for the construction of the  $\Delta tcdA$  and  $\Delta tcdB$  mutants were subsequently  
**150** mated with *C. difficile* 630 $\Delta erm\Delta pyrE$  and transconjugants were selected by sub-  
**151** culturing on BHI agar containing thiamphenicol (15  $\mu$ g/mL) and cefoxitin (25  $\mu$ g/mL)  
**152** and re-streaked twice in this medium. Colonies were screened by colony PCR with  
**153** DNA prepared using 5% chelex resin (Sigma-Aldrich) to identify single-crossover  
**154** mutants. For the *tcdA* gene the primer pairs YN3-vef-Fw/ *tcdA*-vef-Fw and YN3-vef-  
**155** Rev/ *tcdA*-vef-Rev were used, while for *tcdB* the primer pairs YN3-vef-Fw/ *tcdB*-vef-  
**156** Fw and YN3-vef-Rev/ *tcdB*-vef-Rev were used. The single-crossover mutants  
**157** identified were streaked onto CDMM<sup>3</sup> with 1% agar supplemented with 5-  
**158** Fluoroorotic acid (2 mg/mL) and uracil (5  $\mu$ g/mL) in order to select for plasmid

excision. The isolated FOA-resistant colonies were screened by colony PCR using the primer pair *tcdA*-vef-Fw/*tcdA*-vef-Rev for *tcdA* and *tcdB*-vef-Fw/*tcdB*-vef-Rev for *tcdB*, which flank the upstream and downstream homology regions.

The double-crossover mutants that were thiamphenicol sensitive (AHCD999 for *tcdA* and AHCD1415 for *tcdB*) were reverted to a PyrE<sup>+</sup> phenotype through conjugation with the plasmid pMTL-YN1. The resulting colonies were streaked onto non-supplemented CDMM agar and the restoration of the *pyrE* allele was confirmed by colony PCR using the primer pair *pyrE*-vef-Fw/*pyrE*-vef-Rev. This produced strains AHCD1002 ( $\Delta tcdA$ ) and AHCD1439 ( $\Delta tcdB$ ). The double-crossover  $\Delta tcdA$  mutant that was thiamphenicol sensitive (*pyrE*<sup>-</sup>) was used to mate with *E. coli* AHEC499 to construct the double  $\Delta tcdA/\Delta tcdB$  mutant AHCD1046, using the same methodology outlined above for the single mutant. This strain was reverted to a PyrE<sup>+</sup> phenotype through conjugation with pMTL-YN1. The resulting colonies were streaked onto non-supplemented CDMM agar and the presence of a restored *pyrE* allele was confirmed by colony PCR using the primer pair *pyrE*-vef-Fw/*pyrE*-vef-Rev. This screen led to the isolation of strain AHCD1066.

**Complementation through allelic exchange at the *pyrE* locus.** In order to complement the  $\Delta tcdR$  mutation, the coding sequence of the *tcdR* gene and its promoter region, a total of 1460 bp, was PCR amplified from 630 $\Delta erm$  or R20291 genomic DNA, using the primer pair *tcdR*-comp-BamHI-Fw/*tcdR*-comp-HindIII-Rev and the fragment inserted between the BamHI and HindIII sites of either pMTL-YN1C, yielding pSR5 (for 630 $\Delta erm$ ) and pMTL-YN2C, yielding pSR34 (for R20291). pSR5 and pSR34 were transformed into *E. coli* HB101 (RP4) yielding strains AHEC285 and AHEC661, respectively, and subsequently mated with *C. difficile* 630 $\Delta erm\Delta pyrE\Delta tcdR$  and R20291 $\Delta pyrE\Delta tcdR$ . The transconjugants obtained were

184 streaked onto CDMM and tested by colony PCR using primer pair *tcdR*-vef-Fw/  
185 *tcdR*-vef-Rev to test for both *tcdR* complementation and with primer pair *pyrE*-vef-  
186 Fw/*pyrE*-vef-Rev for *pyrE* reversion; clones with the expected changes were  
187 identified and named AHCD828, for 630 $\Delta$ *erm*, and AHCD1161, for R20291.

188 Plasmids pMS470 and pMS464 (above; Table S3) were introduced into the  
189 complementation strain through matting from *E. coli* HB101 (RP4) derivatives,  
190 resulting in strains AHCD845 and AHCD846, respectively.

191 **Placing *tcdR* under the control of forespore- or mother cell-specific**  
192 **promoters.** The *sspA* or *spoIIIA* promoters were fused to the *tcdR* gene using  
193 overlap extension PCR. The *tcdR* gene was PCR amplified from *C. difficile*  
194 630 $\Delta$ *erm* genomic DNA with an optimized RBS using the primer pair TcdR-RBSopt-  
195 Fw/ TcdR-comp-HindIII-Rev, producing a 723bp. The PCR fragment was inserted  
196 between the XhoI/HindIII sites of pMTL-YN1C, to produce pCC44. The *sspA* and  
197 *spoIIIA* promoter regions were PCR amplified using primer pairs PsspA-BamHI-  
198 Fw/ PsspA-SNAP-XhoI-Rev and PspoIIIA-BamHI-Fw/ PspoIIIA-SNAP-XhoI-Rev,  
199 producing fragments of 482 and 494 bp which were inserted between the  
200 BamHI/XhoI sites of pCC44 to give pCC45 (*P<sub>sspA</sub>-tcdR*) and pCC46 (*P<sub>spoIIIA</sub>-tcdR*).  
201 The plasmids were transformed into *E. coli* HB101 (RP4) yielding strains AHEC391  
202 and AHEC389, respectively, and subsequently transferred to *C. difficile*  
203 630 $\Delta$ *erm* $\Delta$ *pyrE* $\Delta$ *tcdR* by conjugation.

204 The transconjugants obtained were streaked onto CDMM and tested by  
205 colony PCR using the primer pair PsspA-BamHI-Fw/ TcdR-comp-XhoI-Rev and  
206 PspoIIIA-BamHI-Fw/ TcdR-comp-XhoI-Rev to test for integration and with the  
207 primer pair *pyrE*-vef-Fw/*pyrE*-vef-Rev to test for *pyrE* reversion, yielding strains  
208 AHCD900 (*P<sub>sspA</sub>-tcdR*) and AHCD926 (*P<sub>spoIIIA</sub>-tcdR*), respectively.

**209 Construction of a  $\Delta spoVT$  in-frame deletion mutant using CRISPR-Cas9.** A  
**210** CRISPR-Cas9-based approach<sup>4</sup> was used for the in-frame deletion of the *spoVT*  
**211** gene in the *C. difficile* 630 $\Delta erm$  *sigG* mutant previously constructed using the  
**212** ClosTron system<sup>1</sup>. The sgRNA, used to target the Cas9 nuclease to the *spoVT*  
**213** gene, was obtained by a primer dimer PCR reaction. The primers for amplification  
**214** were designed by adding the 20 nucleotides SEED region identified with the  
**215** Benchling software (<https://benchling.com/crispr>) to the universal forward primer  
**216** (SpoVT\_sgRNA\_Fw) together with the universal reverse primer sgRNA\_Rev. The  
**217** allele exchange cassette composed of a left-hand homology arm (LHA) and a right-  
**218** hand homology arm (RHA) was obtained by overlap extension PCR using the  
**219** primer pair spoVT-Ascl-Fw/spoVT-SOE-Rev for the LHA originating a 701 bp  
**220** fragment and spoVT-SOE-Fw/spoVT-AsiSI-Rev for the RHA originating a 709bp  
**221** fragment. The final PCR was done with the primer pair spoVT-Ascl-Fw/spoVT-  
**222** AsiSI-Rev originating a 1410 bp fragment that was inserted between the Ascl/AsiSI  
**223** sites of pMTL-Cas9<sup>4</sup> together with the sgRNA fragment that was cloned between  
**224** the Sall/AsiSI sites, to yield pCC86, the sequence of which was verified. pCC86  
**225** was introduced into *E. coli* HB101 (RP4) to give AHEC855 and then introduced into  
**226** *C. difficile* 630 $\Delta erm$  *sigG* by conjugation. Transconjugants were selected by sub-  
**227** culturing on BHI agar containing thiamphenicol (15  $\mu$ g/mL) and cefoxitin (25  $\mu$ g/mL)  
**228** and then re-streaked in this medium. The selected transconjugants were screened  
**229** by colony PCR using the primer pair spoVT-vef-Fw/spoVT-vef-Rev. A strain with the  
**230** expected structure was isolated and named AHCD1418.

**231 Plasmids and strains for the overproduction of TcdR,  $\sigma^D$ ,  $\sigma^G$  and SpoVT in *E.***  
**232 *coli*.** For TcdR overproduction, *tcdR* was amplified from *C. difficile* 630 $\Delta erm$   
**233** genomic DNA using the primer pair TcdR-NcoI-Fw/ TcdR-Sall-Rev that produced a

234 551bp fragment and cloned between the NcoI/SalI sites in pFN127 (pET16b-Strep  
 235 tagII; Amp<sup>R</sup>), originating pCC17. For  $\sigma^G$  overexpression, *sigG* was amplified from  
 236 *C. difficile* 630 $\Delta$ *erm* genomic DNA using the primer pair CDSigGpET28a-Fw/  
 237 CDSigGpET28a-Rev that produced a 774bp fragment and cloned between the  
 238 NcoI/XhoI sites in pET28a, originating pFT36. For SpoVT overexpression, *spoVT*  
 239 was amplified using the primer pair SpoVT-NdeI-Fw/ SpoVT-XhoI-Rev producing a  
 240 540bp fragment and cloned between the NdeI/XhoI sites in pET16b originating  
 241 pCC22. For  $\sigma^G$  and SpoVT co-induction, *sigG* was cut from pFT36 using NcoI/XhoI  
 242 and cloned NcoI/SalI in pETDuet and *spoVT* was cut from pCC22 using NdeI/XhoI  
 243 and cloned using the same restriction sites in pETDuet already containing *sigG*,  
 244 producing pCC29. For  $\sigma^D$  overproduction, *sigD* was amplified from using the primer  
 245 pair SigD-NcoI-Fw /SigD-XhoI-Rev and cloned between the NcoI/XhoI sites in  
 246 pET28a, originating pCC30. All plasmids were transformed into *E. coli* BL21 (DE3)  
 247 to yield strains AHEC217, AHEC068, AHEC304 and AHEC313. Additionally,  
 248 pMS464 and pCC27 were co-transformed into *E. coli* BL21 (DE3) together with  
 249 pFT36, pCC29 or pCC17, yielding strains AHEC290, 291, 314, 316, 317 and 319  
 250 (see Tables S2 and S3). Furthermore, pMS464 was co-transformed with pCC30 to  
 251 produce AHEC320. As a positive control a fusion was constructed between the  
 252 *sspA* promoter and *SNAP<sup>Cd</sup>* using overlap extension PCR. First, primers PsspA-  
 253 EcoRI-Fw/ PsspA-SNAP-SOE-Rev were used to amplify the *sspA* promoter region  
 254 producing a 498bp fragment. Secondly, primer pair SNAP-SOE-Fw/ SNAP<sub>C</sub>-XhoI-  
 255 Rev was used to amplify *SNAP<sup>Cd</sup>* from pFT47 producing a 550bp fragment. Finally,  
 256 primer pair PsspA-EcoRI-Fw / SNAP<sub>C</sub>-XhoI-Rev produced a fragment with 1048bp,  
 257 which was cloned between the EcoRI/ XhoI sites in pMTL84121, yielding pCC32.

258 Plasmid pCC32 was co-transformed into *E. coli* BL21 (DE3) together with pFT36 or  
259 pCC29, yielding strains AHEC853, and AHEC859, respectively.

260

Supplementary figures and legends

Supplementary Figure S1

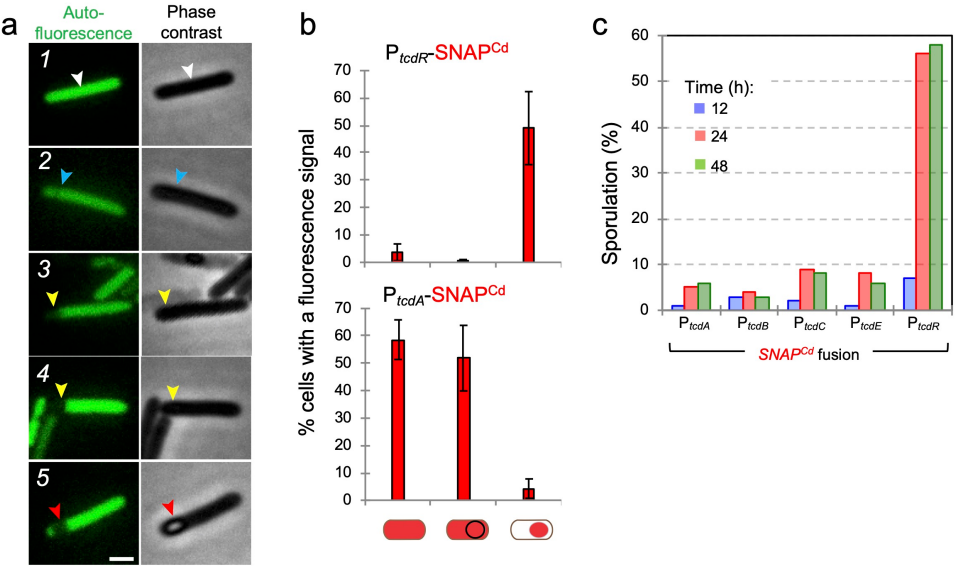

**Fig. S1 - Sporulation and SNAP<sup>Cd</sup> labelling.**a: Phase contrast and fluorescence microscopy of vegetative (1) or sporulating cells (2 to 5) of strain 630 $\Delta$ erm in BHI. The autofluorescence patterns together with phase contrast imaging allows the identification of vegetative cells and cells at different stages of sporulation: 1, vegetative cells; 2, a cell with an asymmetric division septum (the blue arrowhead points to the division septum); 3, 4, cells during engulfment (the yellow arrowhead indicates the position of the forespore); 5, following engulfment completion (the red arrowhead points to the forespore). Scale bar, 1  $\mu$ m. b: Shows the percentage of cells with the indicated patterns of  $P_{tcdR}$ - and  $P_{tcdA}$ -SNAP<sup>Cd</sup> expression scored 24 h after inoculation in BHI. The following patterns of expression were scored (as indicated at the x axis): in vegetative cells, the whole sporangium and forespore-specific. c: The panel shows the efficiency of sporulation (as the percentage of heat resistant spores versus total viable cells) for strains bearing the indicated SNAP<sup>Cd</sup> fusions, measured 12, 24, and 48 hours after inoculation in TY medium.

Supplementary Figure S2

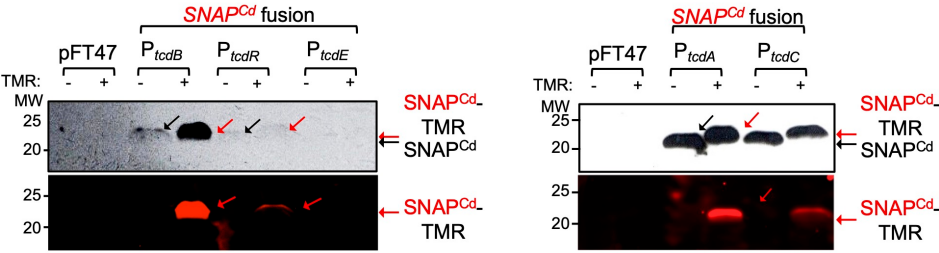

**Fig. S2 - Assessing the extent of SNAP<sup>Cd</sup> labeling.** Whole cell extracts were prepared from derivatives of strain 630Δ*erm* bearing the indicated plasmids or fusions, before ("−") or immediately after ("+") labeling with TMR-Star. The indicated amount of total protein was resolved by SDS-PAGE, and subject to immunoblotting with an anti-SNAP antibody (top). Duplicate gels were scanned on a fluorimager (bottom). Black and red arrows point to unlabeled or TMR-Star-labeled SNAP<sup>Cd</sup>, respectively. Note that TMR-Star forms a covalent complex with SNAP<sup>Cd</sup>, which migrates slower than the unlabeled SNAP<sup>Cd</sup>. Thus, complete labeling of the is indicated by a red band in the fluoroimage that corresponds to a single, slower migrating band in the immunoblot, *i.e.*, no band corresponding to the unlabeled SNAP<sup>Cd</sup> is detected. Strain 630Δ*erm* carrying pFT47 (empty vector) was used as a negative control for SNAP<sup>Cd</sup> production. The position of molecular weight markers (in kDa) is indicated on the left side of the panels.

Supplementary Figure S3

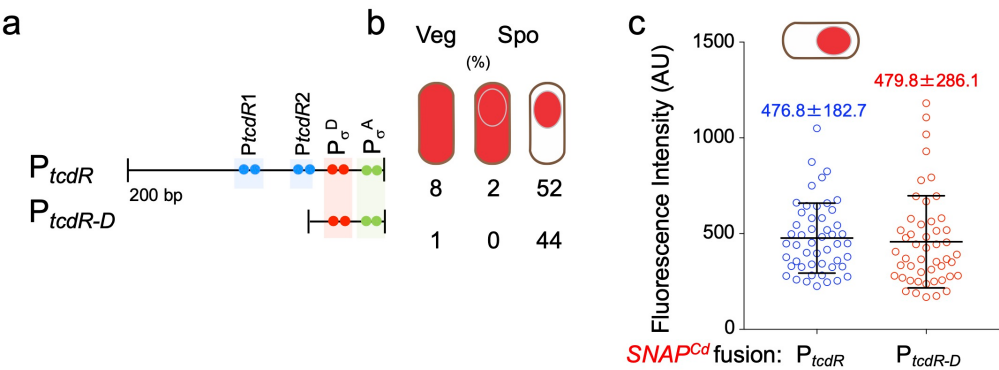

**Fig. S3 - Deletion analysis of the *tcdR* regulatory region.** **a:** Schematic representation of the fragments from the *tcdR* regulatory region, P<sub>tcdR</sub> (see also Figure 1) or P<sub>tcdR-D</sub>, fused to the reporter SNAP<sup>Cd</sup>. P<sub>tcdR1</sub> and P<sub>tcdR2</sub> represent the promoters recognized by TcdR (blue dots), P<sub>σ<sup>D</sup></sub> represents the promoter recognized by σ<sup>D</sup> (red dots) and the green dots show the position of a σ<sup>A</sup>-type promoter. Each construct was inserted in strain 630Δ*erm* (WT). **b:** Percentage of vegetative (Veg) or sporulating cells (Spo) with the indicated pattern of SNAP<sup>Cd</sup> signal. The number of cells analyzed for each fusion, n, is as follows: P<sub>tcdR</sub>-SNAP<sup>Cd</sup>, n = 371; P<sub>tcdR-D</sub>-SNAP<sup>Cd</sup>, n = 584. **c:** Quantitative analysis of the fluorescence intensity (Arbitrary Units, AU) of the SNAP<sup>Cd</sup> signal per forespore for strains expressing the P<sub>tcdR</sub> and P<sub>tcdR-D</sub> fusions represented in **a**. The numbers in the panels represent the mean value ± the standard deviation.

274     **Supplementary Figure S4**

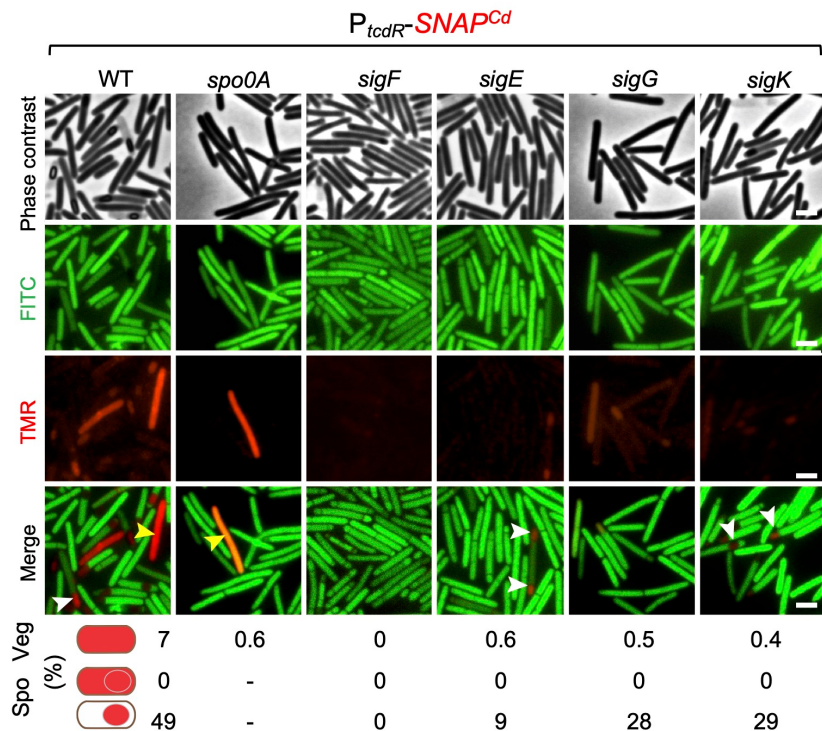

**Fig. S4 - Expression of *tcdR* in sporulation mutants.** Microscopy analysis of *C. difficile* cells carrying the fusion of the *tcdR* promoter to SNAP<sup>Cd</sup> in strain 630Δ*erm* (WT) and in the *spo0A*, *sigF*, *sigE*, *sigG* and *sigK* mutants. The cells were collected after 24h of growth in TY liquid medium, labeled with TMR-Star and examined by phase contrast and fluorescence microscopy to monitor SNAP<sup>Cd</sup> production. The merged images show the overlap between the TMR-Star (red) and the auto-fluorescence (green) channels. The images are representative of the expression patterns observed for the different fusions. The white arrowheads show sporangia with forespore-specific SNAP<sup>Cd</sup> expression (including the diasporic cell in the *sigE* mutant); yellow arrowheads show vegetative cells with expression. Scale bar, 1 μm. Expression patterns were scored as described in the legend for S3 figure and their percentages are indicated below the fluorescence images. Number of cells, n, scored for each strain: WT, n = 983; *spo0A*, n = 1137; *sigE*, n = 1256; *sigG*, n = 1323; *sigK* = 906.

Supplementary Figure S5

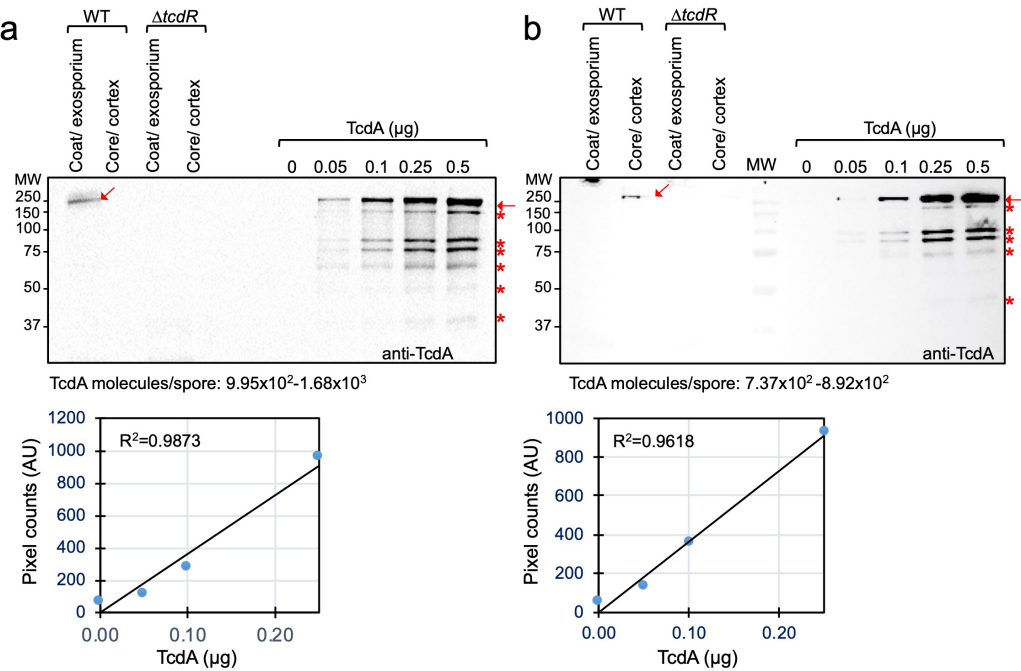

**Fig. S5 - Quantification of spore-associated TcdA.** Quantitative immunoblotting of the spore associated TcdA toxin. Purified spores produced by strains 630 $\Delta$ erm and  $\Delta tcdR$  (a) and R20291 and a congenic  $\Delta tcdR$  mutant (b) were fractionated into a coat/exosporium and a core/cortex fractions. Extracted proteins were resolved by SDS-PAGE along with increasing concentrations of purified TcdA, as indicated. The gels were then subject to immunoblotting with an anti-TcdA antibody. The red arrow points to the position of full-length TcdA; other bands (red asterisks) are likely degradation products of TcdA. The position of MW markers (in kDa) is shown on the left side of the panels. The graphs below each panel show a plot of the pixel counts obtained as a function of the amount of full-length TcdA, and the  $R^2$  value is shown.

287 **Supplementary Figure S6**

288

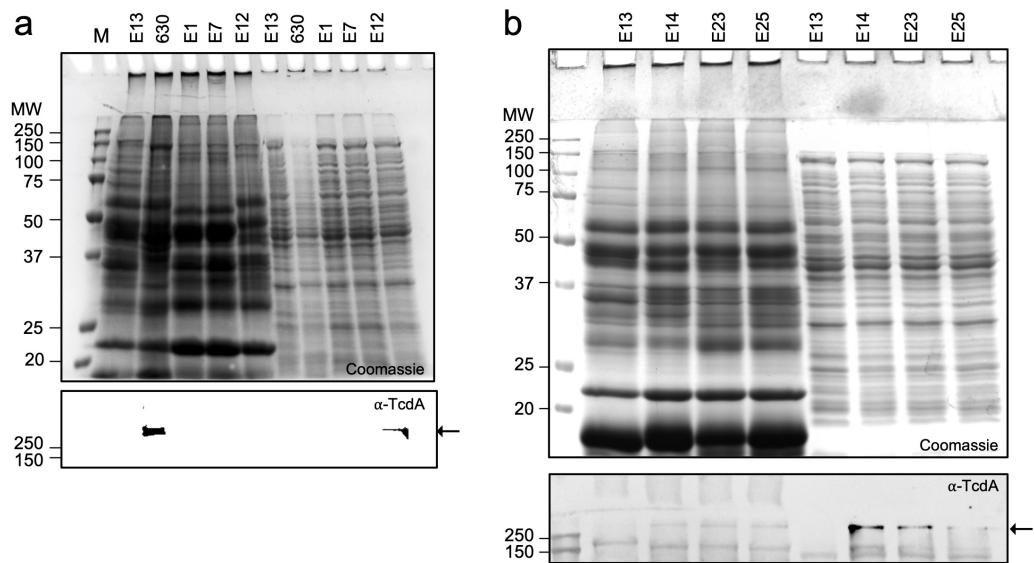

**Fig. S6 - TcdA associates with spores of various ribotypes.** a: Fractionation of spores produced by the indicated strains: a, E13, 630Δerm (630), E1, E7, E12; b, E13, E14, E23, E25; Purified spores were fractionated into a cortex/coat/ exosporium and a core/cortex fraction. The proteins in the various fractions were resolved by SDS-PAGE (top) and subject to immunoblotting (bottom) with an anti-TcdA. Strain E13, a non-toxin producer was used as a control for the specificity of the anti-TcdA antibody. The arrows point to the position of the main form of TcdA. The position off molecular weight markers (in kDa) is shown on the left side of the panels.

289  
290

291

292

293

294

295

296

297

298

299

300

301

302

303 **Supplementary Figure S7**

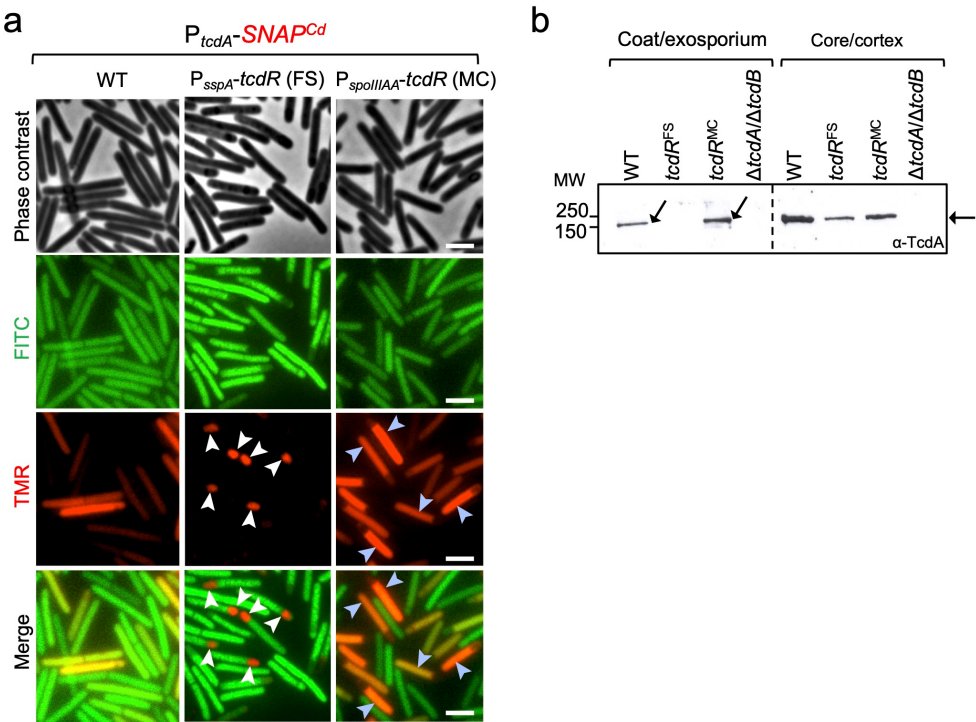

**Fig. S7 - Forespore or mother cell-specific expression of *tcdR*.** a: The pattern of  $P_{tcdA}$ -SNAP<sup>Cd</sup> expression when *tcdR* is under the control of the forespore-specific *sspA* promoter (*tcdR*<sup>FS</sup>) or the mother cell-specific *spoIIIAA* promoter (*tcdR*<sup>MC</sup>). The cells were collected after 24h of growth in TY liquid medium, labeled with TMR-Star and examined by phase contrast and fluorescence microscopy to monitor SNAP<sup>Cd</sup> production. The merged images show the overlap between the TMR-Star (red) and the auto-fluorescence (green) channels. In the  $P_{sspA}$ -*tcdR* (FS) column, the white arrowheads point to sporangia with forespore-specific expression of SNAP<sup>Cd</sup>; in the  $P_{spoIIIAA}$ -*tcdR* (MC) column purple arrowheads point to sporulating cells with mother cell-specific expression. Scale bar, 1  $\mu$ m. b: Fractionation of spores from strains 630 $\Delta$ erm *tcdR*<sup>FS</sup>, *tcdR*<sup>MS</sup> and  $\Delta$ *tcdA*/ $\Delta$ *tcdB* into a coat/exosporium and a core/cortex fractions. The proteins in the various fractions were subject to immunoblotting with an anti-TcdA antibody. The position of TcdA is indicated by a black arrow.

304  
305  
306

307 **Supplementary Figure S8**

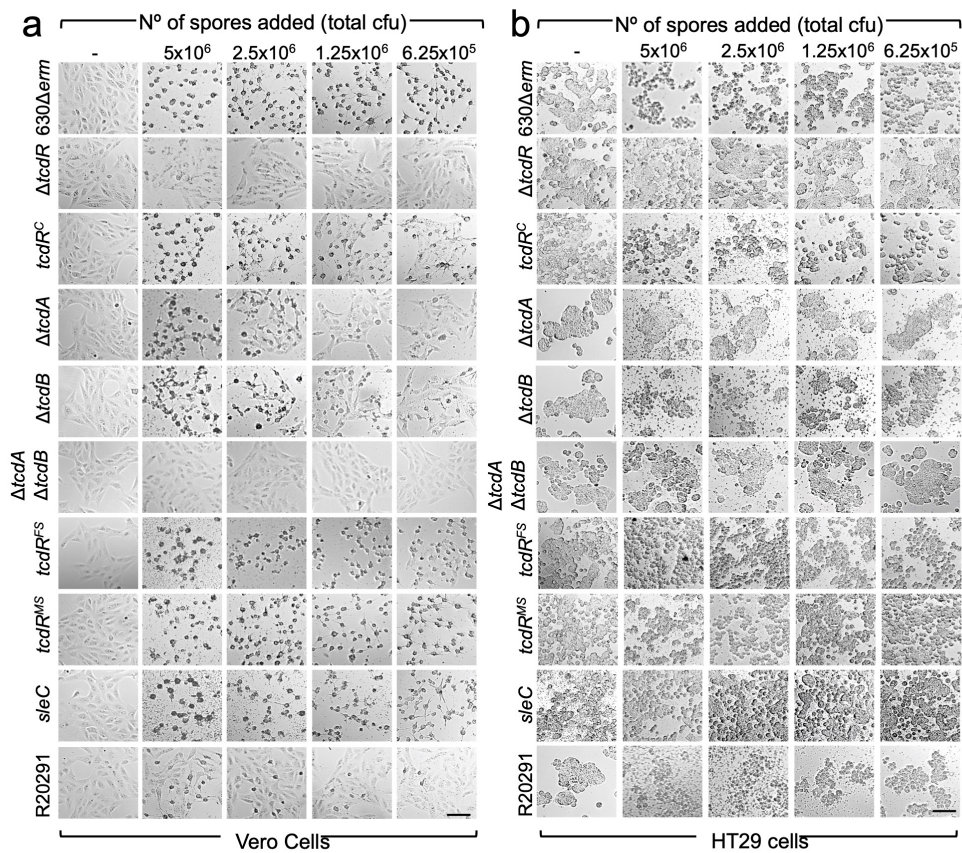

**Fig. S8 - Mature spores are have a cytopathic effect.** Monolayers of HT29 (a) and Vero (b) cells were exposed to different doses of purified spores (numbers at the top of the panel, in CFU's/ml) produced by the strains indicated on the left. Following incubation, the cells were examined by phase contrast microscopy to detect cell rounding. Scale bars, 100  $\mu$ m.

308  
309

Supplementary Figure S9

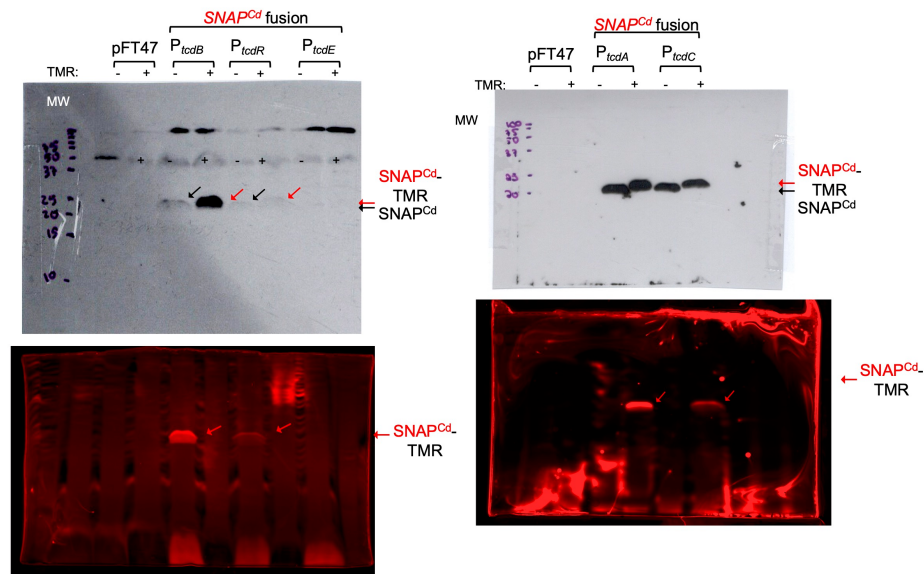

**Fig. S9 - Original immunoblots and fluoroimaging scans for Figure S2. Assessing the extent of SNAP<sup>Cd</sup> labeling.** SDS-PAGE and western blots full-length for Figure S2. Whole cell extracts were prepared from derivatives of strain 630Δerm bearing the indicated plasmids or fusions, before ("−") or immediately after ("+") labeling with TMR-Star. The indicated amount of total protein was resolved by SDS-PAGE, and subject to immunoblotting with an anti-SNAP antibody (top). Duplicate gels were scanned on a fluoroimager (bottom). Black and red arrows point to unlabeled or TMR-Star-labeled, respectively, SNAP<sup>Cd</sup>. Strain 630Δerm carrying pFT47 (empty vector) was used as a negative control for SNAP<sup>Cd</sup> production. The position of molecular weight markers (in kDa) is indicated on the left side of the panels.

314 **Supplementary Figure S10**

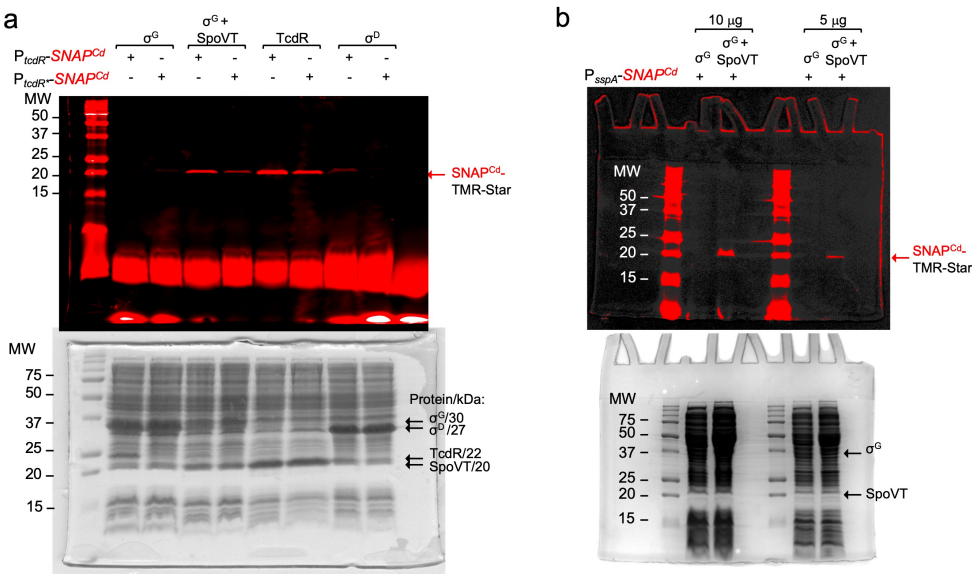

**Fig. S10 - Original gels and fluoroimaging scans for Figure 4d and e. Toxin production in the forespore is dependent on  $\sigma^G$  and SpoVT.** Full-length western blots for panels d and e of Figure 4. a: *E. coli* BL21(DE3) derivatives with plasmids carrying *P<sub>tcdR</sub>-SNAP<sup>Cd</sup>* or *P<sub>tcdR</sub>-SNAP<sup>Cd</sup>+* fusions, as indicated, were transformed with compatible plasmids for the induction of  $\sigma^G$ ,  $\sigma^G$  and SpoVT, TcdR or  $\sigma^D$ . b: As in a, except that *E. coli* BL21(DE3) containing a plasmid with a *P<sub>sspA</sub>-SNAP<sup>Cd</sup>* fusion was transformed with plasmids for the induction of  $\sigma^G$  alone or together with SpoVT, as indicated. In d and e, the various proteins were produced through auto-induction, whole cell extracts prepared, labelled with TMR-Star, proteins resolved by SDS-PAGE, and the gels scanned on a fluoroimager (top) before Coomassie staining (bottom). The position of the various regulatory proteins is indicated by black arrows and their molecular weights is given on the right side of panel a. The position of the SNAP<sup>Cd</sup>-TMR-Star complex is indicated by the red arrows.

315  
316

317  
318  
**Supplementary Figure S11**

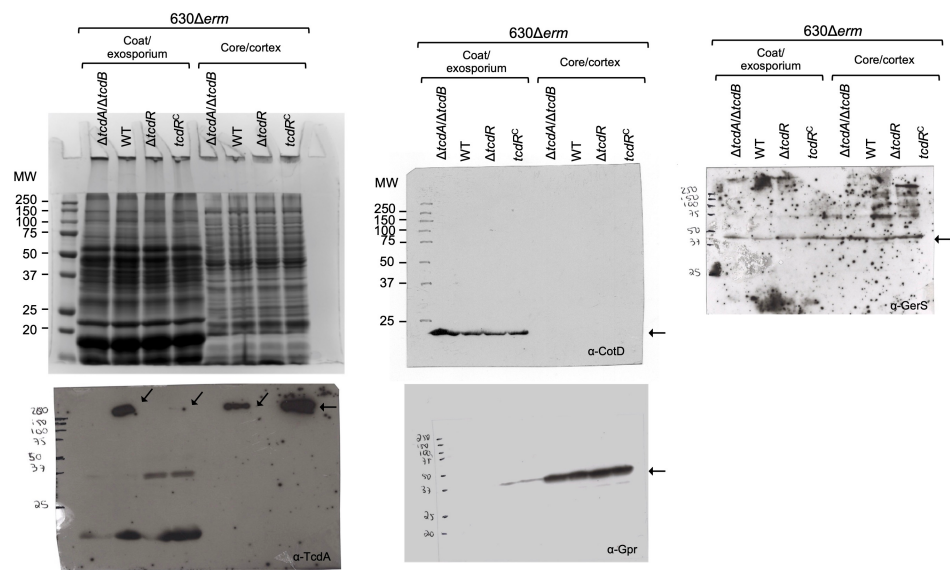

**Fig. S11 - Original gels and immunoblots for Figure 5b. TcdA localization in mature spores of 630Δerm.** Full-length western blots for panel b of Figure 5. Fractionation of 630Δerm spores, their congenic ΔtcdAΔtcdB and ΔtcdR derivatives and a ΔtcdR mutant complemented with the wild-type allele at the pyrE locus, tcdRC. Intact mature spores were fractionated into a coat/ exosporium and a core/cortex fraction. The proteins in the various fractions were resolved by SDS-PAGE (top) and subject to immunoblotting (bottom) with anti-TcdA, and anti-CotD antibodies (CotD is a bona fide coat protein). The extracts were also probed with anti-GPR (GPR is a germination protease localized in the spore core) and anti-GerS antibodies (GerS is a cortex-modifying protein involved in spore germination).

319  
320

Supplementary Figure S12

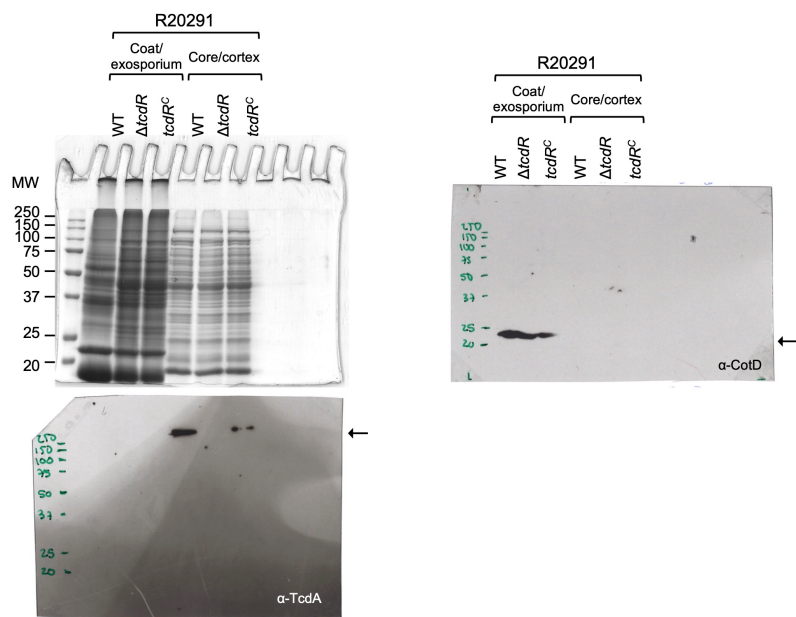

**Fig. S12 - Original gels and immunoblots for Figure 5c. TcdA localization in mature spores of R20291.** Full-length western blots for panel c of Figure 5. Fractionation of R20191 spores, their congenic  $\Delta tcdA\Delta tcdB$  and  $\Delta tcdR$  derivatives and a  $\Delta tcdR$  mutant complemented with the wild-type allele at the *pyrE* locus, *tcdR<sup>c</sup>*. Intact mature spores were fractionated into a coat/ exosporium and a core/cortex fraction. The proteins in the various fractions were resolved by SDS-PAGE and subject to immunoblotting with anti-TcdA, and anti-CotD antibodies (CotD is a bona fide coat protein).

325 **Supplementary Figure S13**  
326

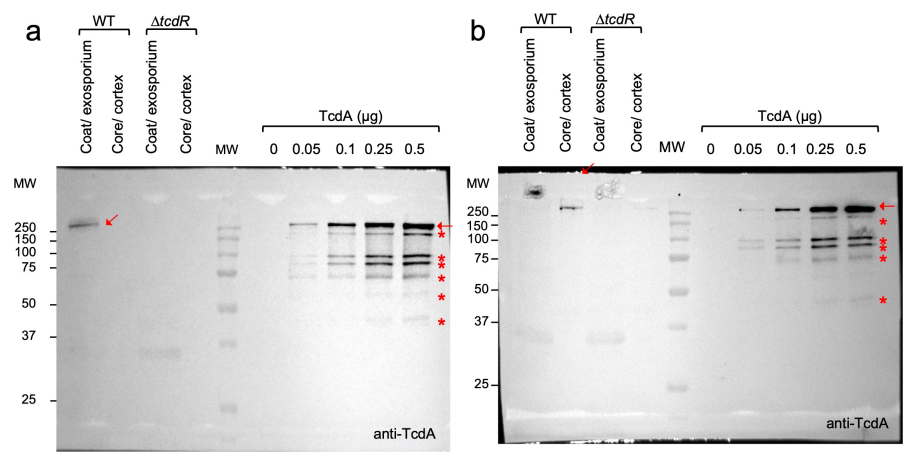

**Fig. S13 - Original immunoblots for Figure S5. Quantification of spore-associated TcdA.** Full-length western blots for the panels a and b of Figure S5. Quantitative immunoblotting of the spore associated TcdA toxin. Purified spores produced by strains 630 $\Delta$ erm and  $\Delta$ tcdR (a) and R20291 and a congenic  $\Delta$ tcdR mutant (b) were fractionated into a coat/exosporium and a core/cortex fractions. Extracted proteins were resolved by SDS-PAGE along with increasing concentrations of purified TcdA, as indicated. The gels were then subject to immunoblotting with an anti-TcdA antibody. The red arrow points to the position of full-length TcdA; other bands (red asterisks) are likely degradation products of TcdA. The position of MW markers (in kDa) is shown on the left side of the panels.

327  
328

Supplementary Figure S14

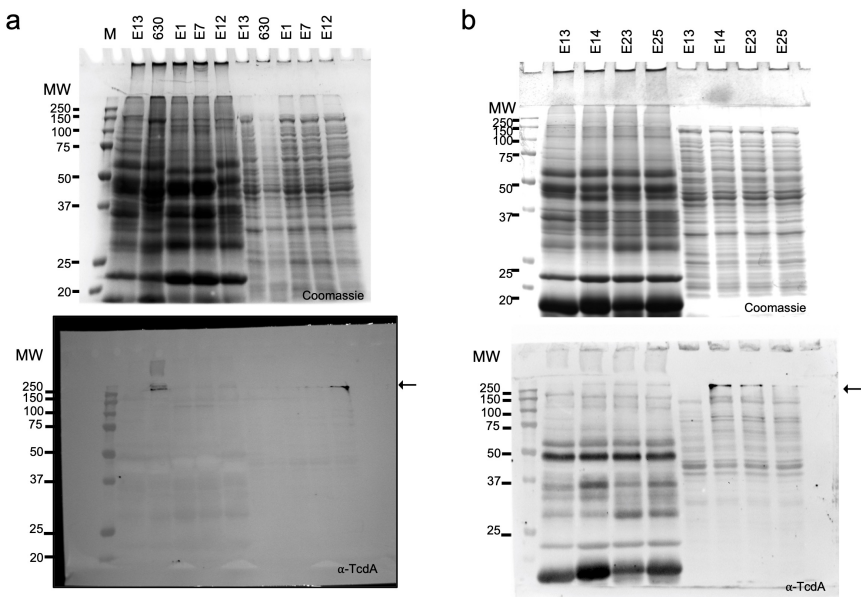

**Fig. S14 - Original gels and immunoblots for Figure S6. TcdA in mature spores produced by strains of different ribotypes.** Full-length SDS-PAGE stained with Coomassie and western of Figure S6. Fractionation of spores produced by the indicated strains. Purified spores were fractionated into a cortex/coat/ exosporium and a core/cortex fraction. The proteins in the various fractions were resolved by SDS-PAGE (top) and subject to immunoblotting (bottom) with anti-TcdA. Strain E13, a non-toxin producer was used as a control for the specificity of the anti-TcdA antibody. The arrows point to the position of the main form of TcdA. The position off molecular weight markers (in kDa), is shown on the left side of the panels.

333    **Supplementary Figure S15**

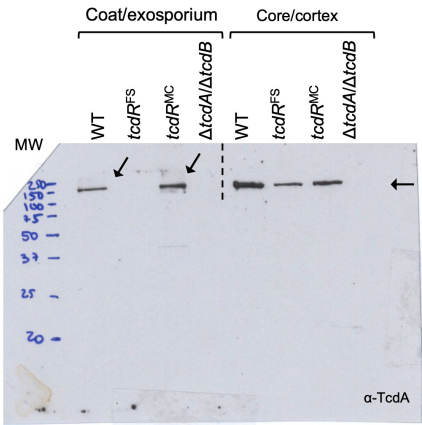

**Fig. S15 - Original immunoblots for Figure S7. Forespore or mother cell-specific expression of *tcdR*.** Full-length western blot for the panel b of Figure S7. Fractionation of spores from strains 630 $\Delta$ erm *tcdR<sup>FS</sup>*, *tcdR<sup>MS</sup>* and  $\Delta tcdA/\Delta tcdB$  into a coat/exosporium and a core/cortex fractions. The proteins in the various fractions were subject to immunoblotting with an anti-TcdA antibody. The position of TcdA is indicated by a black arrow.

334  
335

336 **Supplementary Tables**  
337  
338 **Supplementary Table S1 - Heat resistant spore counts.**

|        | 630Δerm                 |                         |                         | R20291                  |                         |                         |
|--------|-------------------------|-------------------------|-------------------------|-------------------------|-------------------------|-------------------------|
|        | WT                      | ΔtcdR                   | ΔtcdR <sup>C</sup>      | WT                      | ΔtcdR                   | ΔtcdR <sup>C</sup>      |
| Viable | 2.1±2.2x10 <sup>9</sup> | 4.1±3.5x10 <sup>9</sup> | 2.0±1.9x10 <sup>9</sup> | 3.4±0.4x10 <sup>9</sup> | 2.8±0.1x10 <sup>9</sup> | 3.0±0.5x10 <sup>9</sup> |
| Heat   | 3.7±3.5x10 <sup>4</sup> | 1.8±1.5x10 <sup>5</sup> | 8.6±5.6x10 <sup>4</sup> | 1.8±0.9x10 <sup>4</sup> | 7.0±8.5x10 <sup>4</sup> | 9.0±7.7x10 <sup>4</sup> |

339 <sup>1</sup> the numbers represent the average and standard deviation of three different experiments (see the  
340 Material and Methods section). CFU, colony forming units.  
341  
342  
343

**Supplementary Table S2 - Plasmids used in this study.**

| Plasmid   | Relevant features                                                                                          | Origin/<br>reference |
|-----------|------------------------------------------------------------------------------------------------------------|----------------------|
| pMTL84121 | <i>Clostridium</i> modular plasmid containing <i>catP</i> (Cm <sup>R</sup> /Tm <sup>R</sup> )              | Laboratory stock     |
| pMTL-YN1  | Plasmid for <i>pyrE</i> reversion through ACE in 630Δ <i>erm</i>                                           | 2                    |
| pMTL-YN1C | Plasmid for complementation through ACE in 630Δ <i>erm</i>                                                 | "                    |
| pMTL-YN2  | Plasmid for <i>pyrE</i> reversion through ACE in R20291                                                    | "                    |
| pMTL-YN2C | Plasmid for complementation through ACE in R20291                                                          | "                    |
| pMTL-YN3  | Plasmid for mutation through ACE in 630Δ <i>erm</i>                                                        | "                    |
| pMTL-YN4  | Plasmid for mutation through ACE in R20291                                                                 | "                    |
| pET16b    | Expression vector/T7 <i>lac</i> promoter                                                                   | Novagen              |
| pET28a    | "                                                                                                          | "                    |
| pETDuet-1 | "                                                                                                          | "                    |
| pFT47     | pMTL84121-SNAP <sup>Cd</sup> (Cm <sup>R</sup> /Tm <sup>R</sup> )                                           | 1                    |
| pMS464    | pFT47 containing the <i>tcdR</i> promoter region                                                           | This work            |
| pMS470    | pFT47 containing the <i>tcdA</i> promoter region                                                           | "                    |
| pMS471    | pFT47 containing the <i>tcdB</i> promoter region                                                           | "                    |
| pMS472    | pFT47 containing the <i>tcdC</i> promoter region                                                           | "                    |
| pMS473    | pFT47 containing the <i>tcdE</i> promoter region                                                           | "                    |
| pSR1      | pMTL-YN4 containing a LHA and RHA from <i>tcdR</i> (R20291)                                                | "                    |
| pSR3      | pMTL-YN3 containing a LHA and RHA from <i>tcdR</i>                                                         | "                    |
| pSR5      | pMTL-YN1C containing <i>tcdR</i> and its promoter for complementation                                      | "                    |
| pSR7      | pMTL-YN3 containing a LHA and RHA from <i>tcdA</i>                                                         | "                    |
| pSR8      | pMTL-YN3 containing a LHA and RHA from <i>tcdB</i>                                                         | "                    |
| pSR34     | pMTL-YN2C containing <i>tcdR</i> and its promoter for complementation (R20291)                             | "                    |
| pFT36     | pET28a containing <i>sigG</i>                                                                              | "                    |
| pCC17     | pET16b containing <i>tcdR</i> -Strep tagII                                                                 | "                    |
| pCC20     | pFT47 containing 183bp from the <i>tcdR</i> promoter region                                                | "                    |
| pCC22     | pET16b containing <i>spoVT</i>                                                                             | "                    |
| pCC27     | pFT47 containing the <i>tcdR</i> promoter region with point mutations at the <i>sigD</i> promoter          | "                    |
| pCC29     | pETDuet-1 containing <i>sigG</i> and <i>spoVT</i>                                                          | "                    |
| pCC30     | pET28a containing <i>sigD</i>                                                                              | "                    |
| pCC32     | pFT47 containing the <i>sspA</i> promoter region                                                           | "                    |
| pCC44     | pMTL-YN1C containing <i>tcdR</i> with optimized RBS                                                        | "                    |
| pCC45     | pCC44 containing the <i>sspA</i> promoter                                                                  | "                    |
| pCC46     | pCC44 containing the <i>spoIIIAA</i> promoter                                                              | "                    |
| pCC86     | pMTL-Cas9 containing a LHA and RHA from <i>spoVT</i> and the sgRNA with the SEED sequence for <i>spoVT</i> | "                    |

**349 Supplementary Table S3 - Bacterial strains used in this study.**

| Strain                     | Relevant properties                           | Origin/ reference                                                |
|----------------------------|-----------------------------------------------|------------------------------------------------------------------|
| <b><i>E. coli</i></b>      |                                               |                                                                  |
| DH5α                       | General cloning host                          | Invitrogen                                                       |
| HB101 (RP4)                | Host for conjugation into <i>C. difficile</i> | Laboratory stock                                                 |
| AHEC068                    | BL21 (DE3)/ pFT36                             | This work                                                        |
| AHEC076                    | HB101 (RP4)/ pMTL84121                        | 9                                                                |
| AHEC125                    | HB101 (RP4)/ pMS464                           | This work                                                        |
| AHEC144                    | HB101 (RP4)/ pMS470                           | "                                                                |
| AHEC145                    | HB101 (RP4)/ pMS471                           | "                                                                |
| AHEC146                    | HB101 (RP4)/ pMS472                           | "                                                                |
| AHEC147                    | HB101 (RP4)/ pMS473                           | "                                                                |
| AHEC203                    | HB101 (RP4)/ pMTL-YN1                         | 2                                                                |
| AHEC205                    | HB101 (RP4)/ pMTL-YN2                         | "                                                                |
| AHEC217                    | BI21 (DE3)/ pCC17                             | This work                                                        |
| AHEC227                    | HB101 (RP4)/ pSR1                             | "                                                                |
| AHEC237                    | HB101 (RP4)/ pCC20                            | "                                                                |
| AHEC239                    | HB101 (RP4)/ pSR3                             | "                                                                |
| AHEC274                    | HB101 (RP4)/ pCC27                            | "                                                                |
| AHEC285                    | HB101 (RP4)/ pSR5                             | "                                                                |
| AHEC290                    | BL21 (DE3)/ pFT36/ pMS464                     | "                                                                |
| AHEC291                    | BL21 (DE3)/ pFT36/ pCC27                      | "                                                                |
| AHEC304                    | BL21 (DE3)/ pCC29                             | "                                                                |
| AHEC313                    | BL21 (DE3)/ pCC30                             | "                                                                |
| AHEC314                    | BL21 (DE3)/ pCC29/ pMS464                     | "                                                                |
| AHEC316                    | BL21 (DE3)/ pCC29/ pCC27                      | "                                                                |
| AHEC317                    | BL21 (DE3)/ pCC17/ pMS464                     | "                                                                |
| AHEC319                    | BL21 (DE3)/ pCC17/ pCC27                      | "                                                                |
| AHEC320                    | BL21 (DE3)/ pCC30/ pMS464                     | "                                                                |
| AHEC389                    | HB101 (RP4)/ pCC46                            | "                                                                |
| AHEC391                    | HB101 (RP4)/ pCC45                            | "                                                                |
| AHEC498                    | HB101 (RP4)/ pSR7                             | "                                                                |
| AHEC499                    | HB101 (RP4)/ pSR8                             | "                                                                |
| AHEC661                    | HB101 (RP4)/ pSR34                            | "                                                                |
| AHEC853                    | BL21 (DE3)/ pFT36/ pCC32                      | "                                                                |
| AHEC855                    | HB101 (RP4)/ pCC86                            | "                                                                |
| AHEC859                    | BL21 (DE3)/ pCC29/ pCC32                      | "                                                                |
| <b><i>C. difficile</i></b> |                                               |                                                                  |
| AHCD531                    | <i>C. difficile</i> 630Δerm                   | 10                                                               |
| AHCD532                    | 630Δerm sigE::intron ermB*                    | 1                                                                |
| AHCD533                    | 630Δerm sigF::intron ermB                     | "                                                                |
| AHCD534                    | 630Δerm sigG::intron ermB                     | "                                                                |
| AHCD535                    | 630Δerm sigK::intron ermB                     | "                                                                |
| AHCD536                    | 630Δerm spo0A::intron ermB                    | 11                                                               |
| AHCD543                    | 630Δerm containing pMTL84121                  | 1                                                                |
| AHCD608                    | 630Δerm containing pMS464                     | This work                                                        |
| AHCD647                    | AHCD536 containing pMS464                     | "                                                                |
| AHCD648                    | AHCD533 containing pMS464                     | "                                                                |
| AHCD649                    | AHCD532 containing pMS464                     | "                                                                |
| AHCD650                    | AHCD534 containing pMS464                     | "                                                                |
| AHCD651                    | AHCD535 containing pMS464                     | "                                                                |
| AHCD668                    | 630Δerm containing pMS470                     | "                                                                |
| AHCD669                    | 630Δerm containing pMS471                     | "                                                                |
| AHCD670                    | 630Δerm containing pMS472                     | "                                                                |
| AHCD671                    | 630Δerm containing pMS473                     | "                                                                |
| AHCD687                    | 630Δerm sigD::intron ermB                     | 12                                                               |
| AHCD688                    | <i>C. difficile</i> R20291                    | Anaerobe Reference Laboratory,<br>Cardiff, Wales, United Kingdom |
| AHCD772                    | 630Δerm ΔpyrE                                 | 2                                                                |
| AHCD777                    | AHCD659 containing pMS464                     | This work                                                        |
| AHCD779                    | AHCD687 containing pMS470                     | "                                                                |

|          |                                                                                        |           |
|----------|----------------------------------------------------------------------------------------|-----------|
| AHCD780  | AHCD687 containing pMS464                                                              | "         |
| AHCD795  | 630 $\Delta$ <i>erm</i> containing pCC20                                               | "         |
| AHCD811  | 630 $\Delta$ <i>erm</i> $\Delta$ <i>pyrE</i> $\Delta$ <i>tcdR</i>                      | "         |
| AHCD820  | 630 $\Delta$ <i>erm</i> $\Delta$ <i>tcdR</i>                                           | "         |
| AHCD821  | 630 $\Delta$ <i>erm</i> containing pCC27                                               | "         |
| AHCD828  | 630 $\Delta$ <i>erm</i> $\Delta$ <i>tcdR</i> <i>pyrE::tcdR</i>                         | "         |
| AHCD840  | AHCD820 containing pMS470                                                              | "         |
| AHCD841  | AHCD820 containing pMS464                                                              | "         |
| AHCD845  | AHCD828 containing pMS470                                                              | "         |
| AHCD846  | AHCD828 containing pMS464                                                              | "         |
| AHCD900  | 630 $\Delta$ <i>erm</i> $\Delta$ <i>tcdR</i> <i>pyrE::PsspA-tcdR</i>                   | "         |
| AHCD926  | 630 $\Delta$ <i>erm</i> $\Delta$ <i>tcdR</i> <i>pyrE::PspolIIAA-tcdR</i>               | "         |
| AHCD999  | 630 $\Delta$ <i>erm</i> $\Delta$ <i>pyrE</i> $\Delta$ <i>tcdA</i>                      | "         |
| AHCD1002 | 630 $\Delta$ <i>erm</i> $\Delta$ <i>tcdA</i>                                           | "         |
| AHCD1046 | 630 $\Delta$ <i>erm</i> $\Delta$ <i>tcdA</i> $\Delta$ <i>tcdB</i> $\Delta$ <i>pyrE</i> | "         |
| AHCD1066 | 630 $\Delta$ <i>erm</i> $\Delta$ <i>tcdA</i> $\Delta$ <i>tcdB</i>                      | "         |
| AHCD1067 | R20291 $\Delta$ <i>pyrE</i>                                                            | 2         |
| AHCD1093 | R20291 $\Delta$ <i>pyrE</i> $\Delta$ <i>tcdR</i>                                       | This work |
| AHCD1102 | R20291 $\Delta$ <i>tcdR</i>                                                            | "         |
| AHCD1161 | R20291 $\Delta$ <i>tcdR</i> <i>pyrE::tcdR</i>                                          | "         |
| AHCD1415 | 630 $\Delta$ <i>erm</i> $\Delta$ <i>pyrE</i> $\Delta$ <i>tcdB</i>                      | "         |
| AHCD1418 | 630 $\Delta$ <i>erm</i> <i>sigG spoVT</i>                                              | "         |
| AHCD1439 | 630 $\Delta$ <i>erm</i> $\Delta$ <i>tcdB</i>                                           | "         |
| E1       | Ribotype 126                                                                           | 13        |
| E7       | Ribotype 053                                                                           | "         |
| E12      | Ribotype 106                                                                           | "         |
| E13      | Ribotype 017                                                                           | "         |
| E14      | Ribotype 014                                                                           | "         |
| E23      | Ribotype 001/072                                                                       | "         |
| E25      | Ribotype 005                                                                           | "         |

350 \**ermB*, erythromycin resistance determinant.

351

352

**Supplementary references**

1. Pereira, F. C. *et al.* The spore differentiation pathway in the enteric pathogen *Clostridium difficile*. *PLoS genetics* **9**, e1003782–e1003782 (2013).
2. Ng, Y. K. *et al.* Expanding the repertoire of gene tools for precise manipulation of the *Clostridium difficile* genome: allelic exchange using *pyrE* alleles. *PloS one* **8**, e56051–e56051 (2013).
3. Karasawa, T., Ikoma, S., Yamakawa, K. & Nakamura, S. A defined growth medium for *Clostridium difficile*. *Microbiology* **141**, 371–375 (1995).
4. Ingle, P. *et al.* Generation of a fully erythromycin-sensitive strain of *Clostridioides difficile* using a novel CRISPR-Cas9 genome editing system. *Scientific Reports* **9**, 8123–8123 (2019).
5. Permpoonpattana, P. *et al.* Functional characterization of *Clostridium difficile* spore coat proteins. *Journal of Bacteriology* **195**, 1492–1503 (2013).
6. Fimlaid, K. A. *et al.* Global analysis of the sporulation pathway of *Clostridium difficile*. *PLoS genetics* **9**, e1003660–e1003660 (2013).
7. Diaz, O. R., Sayer, C. V., Popham, D. L. & Shen, A. *Clostridium difficile* Lipoprotein GerS Is Required for Cortex Modification and Thus Spore Germination. *mSphere* **3**, e00205-18 (2018).
8. Yang, G. *et al.* Expression of recombinant *Clostridium difficile* toxin A and B in *Bacillus megaterium*. *BMC Microbiol* **8**, 192 (2008).
9. Heap, J. T., Pennington, O. J., Cartman, S. T. & Minton, N. P. A modular system for *Clostridium* shuttle plasmids. *Journal of Microbiological Methods* **78**, 79–85 (2009).
10. Hussain, H. A., Roberts, A. P. & Mullany, P. Generation of an erythromycin-sensitive derivative of *Clostridium difficile* strain 630 (630 $\Delta$ erm) and demonstration that the conjugative transposon Tn916 $\Delta$ E enters the genome of this strain at multiple sites. *Journal of Medical Microbiology* **54**, 137–141 (2005).
11. Saujet, L., Monot, M., Dupuy, B., Soutourina, O. & Martin-Verstraete, I. The Key Sigma Factor of Transition Phase, SigH, Controls Sporulation, Metabolism, and Virulence Factor Expression in *Clostridium difficile*. *J Bacteriol* **193**, 3186–3196 (2011).

- 386 12. El Meouche, I. *et al.* Characterization of the SigD Regulon of *Clostridium*  
387 *difficile* and Its Positive Control of Toxin Production through the Regulation of  
388 *tcdR*. *PLoS One* **8**, (2013).
- 389 13. Kurka, H. *et al.* Sequence Similarity of *Clostridium difficile* Strains by Analysis  
390 of Conserved Genes and Genome Content Is Reflected by Their Ribotype  
391 Affiliation. *PLOS ONE* **9**, e86535 (2014).  
392
